# Supplementary material for: Interactions with Fibroblasts Are Distinct in Basal-Like and Luminal Breast Cancers
Source: Oxford University Press journal article supplement (doi:10.1158/1541-7786.mcr-10-0372), 2010-12-04
Supplement: 15417786mcr100372-sup-supplementary_table_s6.xls [file 15417786mcr100372-sup-supplementary_table_s6.xls]

## Sheet: supTable6
Gene Signature	Entrez Gene ID	Gene Symbol	Fold-Change*
In vitro Coculture-14	6347	CCL2	1.6237
	4680	CEACAM6	0.878691
	50509	COL5A3	0.753537
	1356	CP	3.2337
	2919	CXCL1	2.36953
	2921	CXCL3	1.22271
	5167	ENPP1	0.517076
	3248	HPGD	0.675286
	3554	IL1R1	0.904867
	7850	IL1R2	1.43679
	93145	OLFM2	1.13937
	5742	PTGS1	1.0687
	6286	S100P	1.02574
	6444	SGCD	0.744836
In vivo Coculture-29	214	ALCAM	0.51593
	55614	C20orf23	0.446863
	92291	CAPN13	0.212264
	9435	CHST2	2.55181
	1047	CLGN	0.548081
	1075	CTSC	2.43988
	8672	EIF4G3	0.670733
	5167	ENPP1	0.517076
	55765	FLJ10901	2.23293
	27086	FOXP1	0.577228
	11226	GALNT6	0.675661
	2633	GBP1	3.29798
	3613	IMPA2	2.66135
	153478	KIAA1909	2.36292
	220074	LOC220074	0.507171
	135112	NCOA7	2.66287
	11098	PRSS23	0.436226
	140885	PTPNS1	2.28315
	6038	RNASE4	0.488026
	12	SERPINA3	0.414482
	6444	SGCD	0.744836
	9120	SLC16A6	0.2639
	6648	SOD2	2.67863
	27347	STK39	0.587951
	7078	TIMP3	0.497035
	79838	TMC5	0.185726
	8792	TNFRSF11A	2.01864
	27242	TNFRSF21	1.97787
	10103	TSPAN-1	0.230391
Fibroblast-30	2	A2M	1.4437
	51281	ANKMY1	0.79069
	55114	ARHGAP17	1.11977
	1117	CHI3L2	2.10883
	114907	FBXO32	1.59189
	4608	MYBPH	1.03318
	4781	NFIB	1.73679
	4792	NFKBIA	1.24214
	23636	NUP62	1.25186
	5156	PDGFRA	1.24083
	9595	PSCDBP	1.65853
	140885	PTPNS1	2.28315
	5806	PTX3	4.33026
	83547	RILP	1.10636
	56833	SLAMF8	1.59658
	6507	SLC1A3	1.80107
	8303	SNN	1.68399
	6648	SOD2	2.67863
	6770	STAR	1.23358
	6775	STAT4	1.3314
	8677	STX10	1.13622
	6925	TCF4	0.695662
	6932	TCF7	1.4763
	51106	TFB1M	0.907091
	9414	TJP2	1.4824
	7127	TNFAIP2	2.12514
	27242	TNFRSF21	1.97787
	9540	TP53I3	1.21278
	7187	TRAF3	1.17441
	9589	WTAP	1.36954
CancerCell-18	114899	C1QTNF3	0.593246
	715	C1R	1.49854
	716	C1S	1.54595
	720	C4A	0.159762
	5168	ENPP2	1.33345
	79729	FLJ22938	0.535
	2357	FPR1	1.26062
	55568	GALNT10	0.492601
	84318	MGC13183	1.44861
	2872	MKNK2	0.623676
	5806	PTX3	4.33026
	85004	RERG	0.454535
	6241	RRM2	1.79101
	9121	SLC16A5	0.499906
	64116	SLC39A8	1.65206
	10346	TRIM22	1.58896
	10309	UNG2	0.263229
	7431	VIM	1.52222
*Fold-change is comparing Basal-like to Luminal tumors in the training dataset of 45 Basal-like and 217 Luminal breast cancers.
